# Supplementary material for: Immune characteristics analysis and construction of a four-gene prognostic signature for lung adenocarcinoma based on estrogen reactivity
Source: Springer Nature journal article supplement (doi:10.1186/s12885-023-11415-y), 2023-10-31
Supplement: MOESM5 [file 26245832]

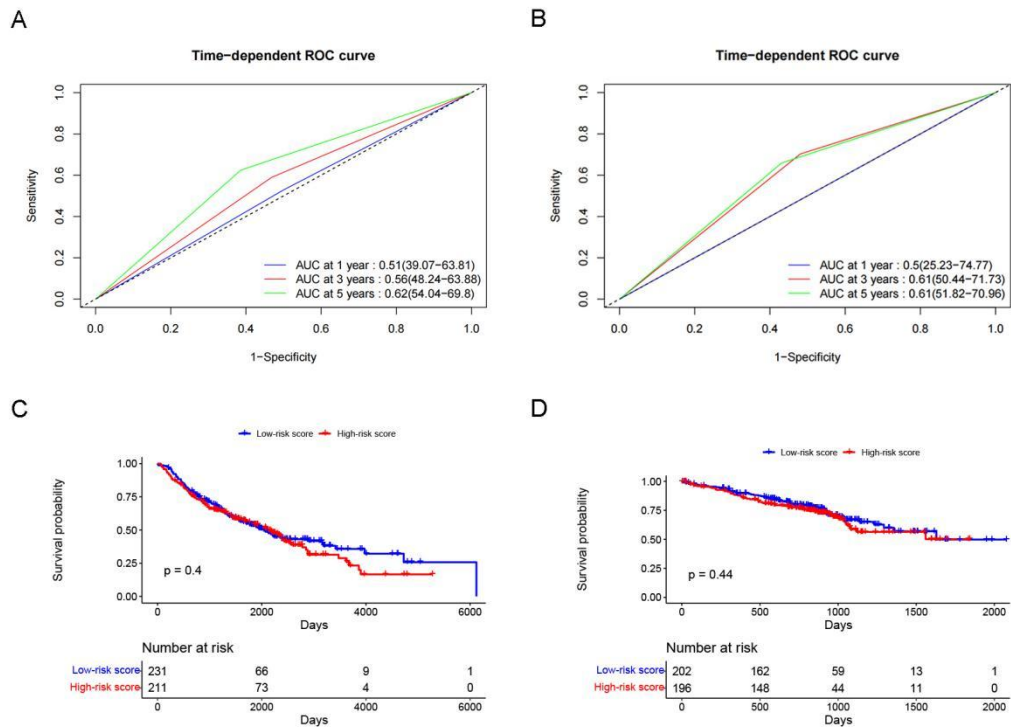

**Supplement Figure 1.** (A) ROC curves of risk score in the GSE31210 recurrence-free survival cohort. (B) ROC curves of risk score in the GSE31210 overall survival cohort. (C) Validation of overall survival between low- and high-risk groups in the GSE68465 cohort. (D) Validation of overall survival between low- and high-risk groups in the GSE72094 cohort.
