# Supplementary material for: Immune characteristics analysis and construction of a four-gene prognostic signature for lung adenocarcinoma based on estrogen reactivity
Source: BMC Cancer. 2023 Oct 31;23:1047. doi: 10.1186/s12885-023-11415-y (PMC10619241; doi:10.1186/s12885-023-11415-y)
Supplement: Supplementary file 1 — Supplementary Material 1 [file 12885_2023_11415_MOESM1_ESM.xlsx]

## Sheet: table.GO
Supplementary Table 1: Results of GO analysis.
ONTOLOGY	ID	Description	GeneRatio	BgRatio	pvalue	p.adjust	qvalue	geneID	Count
BP	GO:0019730	antimicrobial humoral response	28/852	122/18723	8.6899e-13	3.81921e-09	3.65799e-09	KRT6A/WFDC5/S100A7/PRSS2/PI3/H2BC7/FGA/KLK7/WFDC13/H2BC8/PRSS3/FGB/REG1A/SPINK5/TF/H2BC11/DEFB1/CXCL14/SLPI/PGLYRP3/ACOD1/H2BC6/BPIFA1/KLK5/WFDC12/LTF/PF4/PRTN3	28
BP	GO:0006334	nucleosome assembly	27/852	129/18723	2.22264e-11	3.54243e-08	3.3929e-08	H3C7/H4C3/H4C4/H3C11/H4C1/H4C5/TSPYL6/H3C2/H2BC14/H4C2/H3C3/H3C1/H3C12/H2BC7/H2BC17/H2BC9/H2BC13/H2BC8/H3C13/H2BC18/H3C8/H2BC11/H4C15/H2BC6/H4C11/H3C14/H2BU1	27
BP	GO:0006335	DNA replication-dependent nucleosome assembly	14/852	32/18723	3.22406e-11	3.54243e-08	3.3929e-08	H3C7/H4C3/H4C4/H3C11/H4C1/H4C5/H3C2/H4C2/H3C3/H3C1/H3C12/H3C8/H4C15/H4C11	14
BP	GO:0034723	DNA replication-dependent nucleosome organization	14/852	32/18723	3.22406e-11	3.54243e-08	3.3929e-08	H3C7/H4C3/H4C4/H3C11/H4C1/H4C5/H3C2/H4C2/H3C3/H3C1/H3C12/H3C8/H4C15/H4C11	14
BP	GO:0019731	antibacterial humoral response	18/852	60/18723	8.92095e-11	7.84152e-08	7.5105e-08	WFDC5/PI3/H2BC7/FGA/KLK7/WFDC13/H2BC8/FGB/SPINK5/TF/H2BC11/DEFB1/SLPI/H2BC6/BPIFA1/KLK5/WFDC12/LTF	18
BP	GO:0034728	nucleosome organization	29/852	167/18723	4.668e-10	3.41931e-07	3.27497e-07	H3C7/H4C3/H4C4/H3C11/H4C1/H4C5/TSPYL6/H3C2/H2BC14/H4C2/H3C3/H3C1/H3C12/H2BC7/H2BC17/H2BC9/H2BC13/H2BC8/H3C13/H2BC18/H3C8/H2BC11/H4C15/H2BC6/SYCP3/H4C11/H3C14/CHD5/H2BU1	29
BP	GO:0031497	chromatin assembly	27/852	151/18723	9.47087e-10	5.94636e-07	5.69534e-07	H3C7/H4C3/H4C4/H3C11/H4C1/H4C5/TSPYL6/H3C2/H2BC14/H4C2/H3C3/H3C1/H3C12/H2BC7/H2BC17/H2BC9/H2BC13/H2BC8/H3C13/H2BC18/H3C8/H2BC11/H4C15/H2BC6/H4C11/H3C14/H2BU1	27
BP	GO:0006323	DNA packaging	31/852	199/18723	1.89064e-09	1.03867e-06	9.94823e-07	H3C7/H4C3/H4C4/H3C11/H4C1/H4C5/TSPYL6/H3C2/H2BC14/H4C2/H3C3/H3C1/H3C12/H2BC7/H2BC17/TTN/H2BC9/H2BC13/H2BC8/H3C13/H2BC18/H3C8/H2BC11/H4C15/ERN2/H2BC6/SYCP3/H4C11/H3C14/CHD5/H2BU1	31
BP	GO:0006333	chromatin assembly or disassembly	27/852	177/18723	3.28303e-08	1.60321e-05	1.53554e-05	H3C7/H4C3/H4C4/H3C11/H4C1/H4C5/TSPYL6/H3C2/H2BC14/H4C2/H3C3/H3C1/H3C12/H2BC7/H2BC17/H2BC9/H2BC13/H2BC8/H3C13/H2BC18/H3C8/H2BC11/H4C15/H2BC6/H4C11/H3C14/H2BU1	27
BP	GO:0050912	detection of chemical stimulus involved in sensory perception of taste	12/852	42/18723	2.28337e-07	0.000100354	9.6118e-05	TAS2R30/TAS2R50/TAS2R13/TAS2R3/TAS2R43/TAS2R31/TAS2R4/TAS2R10/TAS2R20/CST4/TAS2R14/PKD1L3	12
BP	GO:0001580	detection of chemical stimulus involved in sensory perception of bitter taste	11/852	36/18723	3.42974e-07	0.000131724	0.000126163	TAS2R30/TAS2R50/TAS2R13/TAS2R3/TAS2R43/TAS2R31/TAS2R4/TAS2R10/TAS2R20/CST4/TAS2R14	11
BP	GO:0007127	meiosis I	21/852	129/18723	3.59655e-07	0.000131724	0.000126163	BTBD18/MND1/PRDM7/MSH4/MEIOC/SHOC1/TEX15/TERB1/SYCP2/TEX12/DMRT1/RNF212B/SPATA22/PTTG2/MEI4/SYCP3/MAEL/MSH5/WEE2/MAJIN/C1orf146	21
BP	GO:0061844	antimicrobial humoral immune response mediated by antimicrobial peptide	16/852	79/18723	4.29273e-07	0.000142383	0.000136373	KRT6A/S100A7/H2BC7/KLK7/H2BC8/REG1A/SPINK5/H2BC11/DEFB1/CXCL14/PGLYRP3/H2BC6/BPIFA1/KLK5/LTF/PF4	16
BP	GO:0065004	protein-DNA complex assembly	27/852	201/18723	4.67122e-07	0.000142383	0.000136373	H3C7/H4C3/H4C4/H3C11/H4C1/H4C5/TSPYL6/H3C2/H2BC14/H4C2/H3C3/H3C1/H3C12/H2BC7/H2BC17/H2BC9/H2BC13/H2BC8/H3C13/H2BC18/H3C8/H2BC11/H4C15/H2BC6/H4C11/H3C14/H2BU1	27
BP	GO:0010951	negative regulation of endopeptidase activity	31/852	252/18723	4.91241e-07	0.000142383	0.000136373	WFDC5/SPINK4/SERPINA4/PI3/A2ML1/SERPINB5/SERPINB7/WFDC13/ANXA8/SERPINB3/SPINK5/ANXA8L1/SPINK9/SERPINB2/SLPI/SERPINB4/SPINK1/WFDC12/LTF/CST4/KNG1/ADORA2A/SERPINI2/FURIN/SERPINE3/FETUB/PZP/KLF4/MT3/NR4A1/SPOCK3	31
BP	GO:0045653	negative regulation of megakaryocyte differentiation	8/852	18/18723	5.18347e-07	0.000142383	0.000136373	H4C3/H4C4/H4C1/H4C5/H4C2/H4C15/H4C11/PF4	8
BP	GO:0006338	chromatin remodeling	31/852	255/18723	6.37317e-07	0.000164765	0.00015781	H3C7/H4C3/H4C4/H3C11/H4C1/H4C5/TSPYL6/H3C2/H2BC14/H4C2/H3C3/H3C1/H3C12/H2BC7/H2BC17/H2BC9/H2BC13/H2BC8/H3C13/H2BC18/H3C8/ACTL6B/H2BC11/CHD1L/H4C15/H2BC6/SYCP3/H4C11/H3C14/CHD5/H2BU1	31
BP	GO:0061982	meiosis I cell cycle process	21/852	135/18723	7.82526e-07	0.000191067	0.000183001	BTBD18/MND1/PRDM7/MSH4/MEIOC/SHOC1/TEX15/TERB1/SYCP2/TEX12/DMRT1/RNF212B/SPATA22/PTTG2/MEI4/SYCP3/MAEL/MSH5/WEE2/MAJIN/C1orf146	21
BP	GO:0007586	digestion	21/852	137/18723	1.00286e-06	0.000231978	0.000222186	TFF1/TFF2/SLC9A4/PRSS2/MUC2/PRSS1/CCK/VSIG1/PRSS3/CAPN9/MUC13/GCNT3/CHRM5/MUC6/APOA2/NPC1L1/TJP2/UCN3/AKR1C1/TFF3/AKR1C2	21
BP	GO:0010466	negative regulation of peptidase activity	31/852	262/18723	1.14831e-06	0.000252342	0.00024169	WFDC5/SPINK4/SERPINA4/PI3/A2ML1/SERPINB5/SERPINB7/WFDC13/ANXA8/SERPINB3/SPINK5/ANXA8L1/SPINK9/SERPINB2/SLPI/SERPINB4/SPINK1/WFDC12/LTF/CST4/KNG1/ADORA2A/SERPINI2/FURIN/SERPINE3/FETUB/PZP/KLF4/MT3/NR4A1/SPOCK3	31
BP	GO:0050909	sensory perception of taste	14/852	66/18723	1.24989e-06	0.000252409	0.000241754	TAS2R30/TAS2R50/TAS2R13/TAS2R3/TAS2R43/TAS2R31/TAS2R4/CALHM3/TAS2R10/TAS2R20/TRPM5/CST4/TAS2R14/PKD1L3	14
BP	GO:0071103	DNA conformation change	33/852	290/18723	1.26348e-06	0.000252409	0.000241754	H3C7/H4C3/H4C4/H3C11/H4C1/H4C5/TSPYL6/H3C2/H2BC14/H4C2/H3C3/H3C1/H3C12/H2BC7/H2BC17/TTN/H2BC9/H2BC13/H2BC8/H3C13/H2BC18/H3C8/H2BC11/CHD1L/H4C15/ERN2/H2BC6/TOP3B/SYCP3/H4C11/H3C14/CHD5/H2BU1	33
BP	GO:0050913	sensory perception of bitter taste	11/852	41/18723	1.46378e-06	0.00027971	0.000267902	TAS2R30/TAS2R50/TAS2R13/TAS2R3/TAS2R43/TAS2R31/TAS2R4/TAS2R10/TAS2R20/CST4/TAS2R14	11
BP	GO:0071824	protein-DNA complex subunit organization	29/852	241/18723	1.79478e-06	0.000328669	0.000314795	H3C7/H4C3/H4C4/H3C11/H4C1/H4C5/TSPYL6/H3C2/H2BC14/H4C2/H3C3/H3C1/H3C12/H2BC7/H2BC17/H2BC9/H2BC13/H2BC8/H3C13/H2BC18/H3C8/H2BC11/H4C15/H2BC6/SYCP3/H4C11/H3C14/CHD5/H2BU1	29
BP	GO:0007129	homologous chromosome pairing at meiosis	12/852	52/18723	2.80072e-06	0.000492366	0.000471582	MSH4/MEIOC/TEX15/TERB1/SYCP2/TEX12/RNF212B/SPATA22/MEI4/MAEL/MAJIN/C1orf146	12
BP	GO:0045143	homologous chromosome segregation	13/852	63/18723	4.14466e-06	0.000700608	0.000671033	MSH4/MEIOC/TEX15/TERB1/SYCP2/TEX12/RNF212B/SPATA22/PTTG2/MEI4/MAEL/MAJIN/C1orf146	13
BP	GO:0042445	hormone metabolic process	26/852	218/18723	7.13875e-06	0.00116203	0.00111298	DUOX2/HSD17B2/AKR1B10/UGT2B15/KLK6/DUOXA2/PCSK2/CGA/SULT1B1/UGT2B4/GHRHR/TTR/CYP2C18/AKR1B15/DHRS2/CRABP1/DHRS9/ADH7/FURIN/AKR1C1/CYP1A1/CYP2W1/CYP3A5/CYP3A7/AANAT/AKR1C2	26
BP	GO:0051346	negative regulation of hydrolase activity	37/852	379/18723	1.10785e-05	0.00173893	0.00166552	WFDC5/SPINK4/SERPINA4/ANGPTL3/PI3/A2ML1/FZD10/SERPINB5/SERPINB7/WFDC13/ANXA8/SERPINB3/SPINK5/ANXA8L1/SPINK9/SERPINB2/SLPI/SERPINB4/NOS1/SPINK1/APOA2/WFDC12/KLRK1/LTF/CST4/KNG1/ADCYAP1/ADORA2A/SERPINI2/FURIN/SERPINE3/FETUB/PZP/KLF4/MT3/NR4A1/SPOCK3	37
BP	GO:0140013	meiotic nuclear division	23/852	185/18723	1.20415e-05	0.00182491	0.00174788	BTBD18/MND1/SPDYA/PRDM7/MSH4/MEIOC/SHOC1/TEX15/TERB1/SYCP2/TEX12/DMRT1/RNF212B/SPATA22/PTTG2/MEI4/SYCP3/MAEL/TEX14/MSH5/WEE2/MAJIN/C1orf146	23
BP	GO:0045652	regulation of megakaryocyte differentiation	9/852	36/18723	2.48935e-05	0.0036469	0.00349295	H4C3/H4C4/H4C1/H4C5/H4C2/H4C15/H4C11/PF4/L3MBTL1	9
BP	GO:0045861	negative regulation of proteolysis	34/852	351/18723	2.9263e-05	0.00414873	0.0039736	TM4SF20/WFDC5/SPINK4/SERPINA4/PI3/A2ML1/SERPINB5/SERPINB7/WFDC13/ANXA8/SERPINB3/SPINK5/ANXA8L1/SPINK9/SERPINB2/SLPI/SERPINB4/SPINK1/WFDC12/LTF/CST4/F8A3/KNG1/ADORA2A/SERPINI2/FURIN/SERPINE3/FETUB/PZP/KLF4/MT3/NR4A1/SPOCK3/IL1R2	34
BP	GO:0051791	medium-chain fatty acid metabolic process	6/852	15/18723	3.06578e-05	0.00421066	0.00403292	GLYATL2/CYP4A22/CYP4A11/CYP4Z1/ABHD1/CES1	6
BP	GO:0030277	maintenance of gastrointestinal epithelium	7/852	22/18723	3.68674e-05	0.00491007	0.0047028	TFF1/TFF2/MUC2/VSIG1/MUC13/MUC6/TFF3	7
BP	GO:0006805	xenobiotic metabolic process	16/852	111/18723	4.16611e-05	0.00525954	0.00503752	ALDH3A1/UGT2B15/HNF4A/SULT1B1/ACSM2B/CYP2C18/NOS1/ABCC2/CBR1/UGT1A6/AKR1C1/AADAC/CYP1A1/CYP2W1/CYP3A5/CYP3A7	16
BP	GO:0006813	potassium ion transport	26/852	241/18723	4.18848e-05	0.00525954	0.00503752	SLC9A4/KCNJ13/KCNC1/SLC12A1/ATP4A/KCNH5/KCNIP4/FXYD4/KCNQ2/HCN4/KCNJ9/SLC9C1/KCNV2/KCNB2/KCNH7/NOS1/TRPM5/SLC9A2/KCNF1/HCN1/WNK3/KCNK2/ADCYAP1/KCNJ10/NPPA/KCNG3	26
BP	GO:1903046	meiotic cell cycle process	23/852	202/18723	4.96228e-05	0.00595479	0.00570342	BTBD18/MND1/SPDYA/PRDM7/MSH4/MEIOC/SHOC1/TEX15/TERB1/SYCP2/TEX12/DMRT1/RNF212B/SPATA22/PTTG2/MEI4/SYCP3/MAEL/TEX14/MSH5/WEE2/MAJIN/C1orf146	23
BP	GO:0034754	cellular hormone metabolic process	18/852	137/18723	5.01313e-05	0.00595479	0.00570342	HSD17B2/AKR1B10/UGT2B15/UGT2B4/TTR/CYP2C18/AKR1B15/DHRS2/CRABP1/DHRS9/ADH7/AKR1C1/CYP1A1/CYP2W1/CYP3A5/CYP3A7/AANAT/AKR1C2	18
BP	GO:0031424	keratinization	11/852	58/18723	5.20065e-05	0.00596644	0.00571458	SPRR3/SPRR1B/KRT16/KRT17/SPRR1A/SPRR2D/KLK5/CERS3/SPRR2A/HRNR/IVL	11
BP	GO:0045638	negative regulation of myeloid cell differentiation	14/852	90/18723	5.29973e-05	0.00596644	0.00571458	H4C3/H4C4/H4C1/H4C5/H4C2/CLDN18/INHA/HOXB8/H4C15/TMEM178A/LTF/H4C11/SFRP1/PF4	14
BP	GO:0006959	humoral immune response	31/852	317/18723	5.43021e-05	0.00596644	0.00571458	KRT6A/WFDC5/S100A7/PRSS2/PI3/H2BC7/FGA/KLK7/WFDC13/H2BC8/PRSS3/FGB/REG1A/SPINK5/TF/H2BC11/DEFB1/CXCL14/SLPI/PGLYRP3/ACOD1/H2BC6/BPIFA1/KLK5/WFDC12/LTF/MASP2/IFNG/PF4/CRP/PRTN3	31
BP	GO:0070192	chromosome organization involved in meiotic cell cycle	12/852	69/18723	5.87649e-05	0.00629931	0.0060334	MSH4/MEIOC/TEX15/TERB1/SYCP2/TEX12/RNF212B/SPATA22/MEI4/MAEL/MAJIN/C1orf146	12
BP	GO:0071805	potassium ion transmembrane transport	24/852	219/18723	6.36125e-05	0.0066566	0.0063756	SLC9A4/KCNJ13/KCNC1/SLC12A1/ATP4A/KCNH5/KCNIP4/FXYD4/KCNQ2/HCN4/KCNJ9/SLC9C1/KCNV2/KCNB2/KCNH7/TRPM5/SLC9A2/KCNF1/HCN1/WNK3/KCNK2/KCNJ10/NPPA/KCNG3	24
BP	GO:0120254	olefinic compound metabolic process	19/852	153/18723	6.85029e-05	0.00697134	0.00667706	AKR1B10/AWAT1/CYP4A22/CYP4A11/TTR/PLA2G10/CYP4F3/CYP2C18/AKR1B15/CYP4F11/DHRS9/CYP4Z1/CBR1/ADH7/AKR1C1/CYP1A1/CYP3A5/CYP3A7/AKR1C2	19
BP	GO:0001523	retinoid metabolic process	13/852	81/18723	6.97928e-05	0.00697134	0.00667706	AKR1B10/TTR/CYP2C18/AKR1B15/RLBP1/CRABP1/DHRS9/ADH7/AKR1C1/CYP1A1/CYP2W1/CYP3A5/CYP3A7	13
BP	GO:0045132	meiotic chromosome segregation	14/852	93/18723	7.6655e-05	0.00748664	0.0071706	MSH4/MEIOC/SHOC1/TEX15/TERB1/SYCP2/TEX12/RNF212B/SPATA22/PTTG2/MEI4/MAEL/MAJIN/C1orf146	14
BP	GO:0052548	regulation of endopeptidase activity	38/852	432/18723	8.38399e-05	0.00801036	0.00767222	WFDC5/SPINK4/SERPINA4/GRIN2B/PI3/A2ML1/CCK/SERPINB5/SERPINB7/WFDC13/ANXA8/SERPINB3/ST18/SPINK5/EPHA7/ANXA8L1/SPINK9/SERPINB2/SLPI/SERPINB4/SPINK1/WFDC12/LTF/CST4/KNG1/ADORA2A/SERPINI2/FURIN/SERPINE3/FETUB/DIABLO/USP50/ST20/PZP/KLF4/MT3/NR4A1/SPOCK3	38
BP	GO:0046717	acid secretion	9/852	43/18723	0.000112027	0.0102942	0.00985968	TFF2/SLC9A4/NTSR1/SLC10A1/CHRM5/SV2A/ABCC2/CES1/HTR1B	9
BP	GO:0042573	retinoic acid metabolic process	8/852	34/18723	0.000112429	0.0102942	0.00985968	CYP2C18/CRABP1/DHRS9/ADH7/CYP1A1/CYP2W1/CYP3A5/CYP3A7	8
BP	GO:0032536	regulation of cell projection size	5/852	12/18723	0.000116871	0.0104826	0.0100401	CDHR2/CDHR5/USH1C/WNT7A/CNTN2	5
BP	GO:0006721	terpenoid metabolic process	14/852	97/18723	0.000122165	0.0107383	0.010285	HMGCS2/AKR1B10/TTR/CYP2C18/AKR1B15/RLBP1/CRABP1/DHRS9/ADH7/AKR1C1/CYP1A1/CYP2W1/CYP3A5/CYP3A7	14
BP	GO:0006775	fat-soluble vitamin metabolic process	9/852	44/18723	0.000135207	0.0116517	0.0111598	CYP24A1/CYP4F3/RLBP1/CRABP1/CYP4F11/CBR1/IFNG/CYP1A1/CYP2W1	9
BP	GO:0006814	sodium ion transport	25/852	245/18723	0.000143266	0.0120455	0.011537	SLC9A4/SLC13A5/SLC12A1/ATP4A/SLC10A1/FXYD4/SLC38A3/SLC6A15/SLC4A9/ASIC5/HCN4/SLC9C1/CATSPER4/NOS1/BPIFA1/TRPM5/SLC9A2/FGF12/NKAIN3/HCN1/WNK3/NKAIN2/SCN2A/SCN3A/PCSK9	25
BP	GO:0016101	diterpenoid metabolic process	13/852	87/18723	0.000148	0.0120455	0.011537	AKR1B10/TTR/CYP2C18/AKR1B15/RLBP1/CRABP1/DHRS9/ADH7/AKR1C1/CYP1A1/CYP2W1/CYP3A5/CYP3A7	13
BP	GO:0044070	regulation of anion transport	13/852	87/18723	0.000148	0.0120455	0.011537	NTSR1/CCK/SLC10A1/SLC38A3/CYP4A11/ARG1/PLA2G10/SV2A/ABCC2/GABRE/ADORA2A/CES1/HTR1B	13
BP	GO:0051321	meiotic cell cycle	26/852	261/18723	0.000157171	0.0123441	0.011823	BTBD18/MND1/BOLL/SPDYA/PRDM7/MSH4/MEIOC/SHOC1/TEX15/TERB1/SYCP2/TEX12/DMRT1/RNF212B/SPATA22/SMC1B/PTTG2/MEI4/SYCP3/MAEL/TEX14/MSH5/WEE2/MAJIN/C1orf146/SLC26A8	26
BP	GO:0002227	innate immune response in mucosa	7/852	27/18723	0.000157286	0.0123441	0.011823	H2BC7/H2BC8/H2BC11/DEFB1/H2BC6/LTF/BPIFB1	7
BP	GO:0071466	cellular response to xenobiotic stimulus	20/852	177/18723	0.000167107	0.0128849	0.0123409	KCNC1/SLC10A1/ALDH3A1/UGT2B15/HNF4A/SULT1B1/PPM1E/ACSM2B/CYP2C18/NOS1/ABCC2/CBR1/UGT1A6/AKR1C1/AADAC/CYP1A1/CYP2W1/HTR1B/CYP3A5/CYP3A7	20
BP	GO:0007156	homophilic cell adhesion via plasma membrane adhesion molecules	19/852	167/18723	0.000220435	0.0167037	0.0159986	CDH18/DSG3/CDHR2/CDHR5/CDH22/CDH7/MYOT/CDH16/PCDHA9/CDH17/PCDHGC4/CNTN2/DCHS2/PCDH9/PCDHGA8/MYPN/PCDHB1/IGFN1/PCDH8	19
BP	GO:0002385	mucosal immune response	8/852	38/18723	0.000257731	0.018966	0.0181654	H2BC7/H2BC8/H2BC11/DEFB1/H2BC6/LTF/BPIFB1/CD160	8
BP	GO:0022600	digestive system process	14/852	104/18723	0.000258922	0.018966	0.0181654	TFF1/TFF2/SLC9A4/MUC2/VSIG1/MUC13/GCNT3/CHRM5/MUC6/APOA2/NPC1L1/TJP2/AKR1C1/TFF3	14
BP	GO:0042363	fat-soluble vitamin catabolic process	5/852	14/18723	0.000273741	0.0197228	0.0188903	CYP24A1/CYP4F3/CRABP1/CYP4F11/CYP2W1	5
BP	GO:0019369	arachidonic acid metabolic process	10/852	59/18723	0.0002989	0.0211881	0.0202937	AWAT1/CYP4A22/CYP4A11/PLA2G10/CYP4F3/CYP2C18/CYP4F11/CYP4Z1/CBR1/CYP1A1	10
BP	GO:0052547	regulation of peptidase activity	38/852	461/18723	0.000313776	0.0218896	0.0209656	WFDC5/SPINK4/SERPINA4/GRIN2B/PI3/A2ML1/CCK/SERPINB5/SERPINB7/WFDC13/ANXA8/SERPINB3/ST18/SPINK5/EPHA7/ANXA8L1/SPINK9/SERPINB2/SLPI/SERPINB4/SPINK1/WFDC12/LTF/CST4/KNG1/ADORA2A/SERPINI2/FURIN/SERPINE3/FETUB/DIABLO/USP50/ST20/PZP/KLF4/MT3/NR4A1/SPOCK3	38
BP	GO:0010669	epithelial structure maintenance	7/852	30/18723	0.000320051	0.0219785	0.0210507	TFF1/TFF2/MUC2/VSIG1/MUC13/MUC6/TFF3	7
BP	GO:0042742	defense response to bacterium	31/852	350/18723	0.000325636	0.022018	0.0210885	KRT6A/WFDC5/S100A7/PI3/H2BC7/FGA/KLK7/WFDC13/H2BC8/HP/FGB/SPINK5/TF/H2BC11/DEFB1/SLPI/PGLYRP3/IRGM/CHGA/H2BC6/BPIFA1/DEFB131B/KLK5/WFDC12/LTF/VGF/LYG2/CRP/IL22RA1/PLAC8/CD160	31
BP	GO:0042572	retinol metabolic process	9/852	50/18723	0.000374306	0.0249254	0.0238732	AKR1B10/TTR/CYP2C18/AKR1B15/DHRS9/ADH7/CYP1A1/CYP3A5/CYP3A7	9
BP	GO:0007188	adenylate cyclase-modulating G protein-coupled receptor signaling pathway	23/852	233/18723	0.000419163	0.0272637	0.0261128	GPR26/PSAPL1/TSHR/GHRHR/CHRM5/GRM6/CALCB/LGR5/GLP2R/GPHA2/GRM4/GCGR/CHGA/ADGRB3/MRAP2/MRAP/UCN3/ADCYAP1/GRM3/ADORA2A/PF4/HTR1B/OPRD1	23
BP	GO:0008544	epidermis development	29/852	324/18723	0.000421828	0.0272637	0.0261128	S100A7/SPRR3/SPRR1B/GJB5/KRT14/KLK7/USH1C/KRT16/KRT17/SPINK5/KRT5/FST/COL17A1/SPRR1A/CALML5/SPRR2D/FA2H/LGR5/USH2A/KLK5/EDAR/CERS3/SPRR2A/HRNR/DCT/SULT2B1/LHFPL5/KLF4/IVL	29
BP	GO:0002251	organ or tissue specific immune response	8/852	41/18723	0.000446316	0.0284284	0.0272283	H2BC7/H2BC8/H2BC11/DEFB1/H2BC6/LTF/BPIFB1/CD160	8
BP	GO:0021700	developmental maturation	26/852	280/18723	0.000472381	0.0296588	0.0284068	SEZ6/SYT4/CAMK2B/CCDC154/SLFN14/SLC26A3/SPINK5/NRXN1/GHRHR/ACTL6B/FGG/DEFB1/IHH/CATSPER4/SPINK1/ADGRB3/CNTN2/LTF/EPO/SYBU/WEE2/RND1/IL21/SLC26A8/ASCL1/NR4A2	26
BP	GO:0035725	sodium ion transmembrane transport	19/852	178/18723	0.000496778	0.0307512	0.0294531	SLC9A4/SLC12A1/ATP4A/FXYD4/SLC6A15/SLC4A9/ASIC5/HCN4/SLC9C1/NOS1/BPIFA1/TRPM5/SLC9A2/FGF12/HCN1/WNK3/SCN2A/SCN3A/PCSK9	19
BP	GO:0009111	vitamin catabolic process	5/852	16/18723	0.000553518	0.0337876	0.0323614	CYP24A1/CYP4F3/CRABP1/CYP4F11/CYP2W1	5
BP	GO:0006336	DNA replication-independent nucleosome assembly	7/852	33/18723	0.000596291	0.0359	0.0343846	H4C3/H4C4/H4C1/H4C5/H4C2/H4C15/H4C11	7
BP	GO:0035418	protein localization to synapse	10/852	65/18723	0.000666097	0.0386834	0.0370504	WNT7A/NRXN1/KIF5C/LGI1/NLGN1/MPP4/GRIN2C/KIF5A/STX1B/BSN	10
BP	GO:0023061	signal release	37/852	463/18723	0.000670645	0.0386834	0.0370504	SYT4/FGA/FAM3D/PDX1/HNF4A/NR1H4/FGB/WNT7A/CPLX2/CGA/ISL1/NRXN1/DOC2A/INHA/GHRHR/FGG/EPHA5/PLA2G10/NLGN1/GRM4/CHGA/SLC30A8/SV2A/VGF/SYBU/NNAT/UCN3/ADCYAP1/ADORA2A/SFRP1/IFNG/SOX11/STX1B/NPPA/HTR1B/NR4A1/CHRNB2	37
BP	GO:0007215	glutamate receptor signaling pathway	9/852	54/18723	0.000675413	0.0386834	0.0370504	GRIN2B/GRIA2/GRIK1/GRIA4/GRM6/FRRS1L/GRM4/GRIN2C/GRM3	9
BP	GO:0032253	dense core granule localization	4/852	10/18723	0.000717364	0.0386834	0.0370504	SYT4/KIF1A/KIF5A/SYBU	4
BP	GO:0099519	dense core granule cytoskeletal transport	4/852	10/18723	0.000717364	0.0386834	0.0370504	SYT4/KIF1A/KIF5A/SYBU	4
BP	GO:1900003	regulation of serine-type endopeptidase activity	4/852	10/18723	0.000717364	0.0386834	0.0370504	ANXA8/SPINK5/ANXA8L1/SPINK1	4
BP	GO:1901950	dense core granule transport	4/852	10/18723	0.000717364	0.0386834	0.0370504	SYT4/KIF1A/KIF5A/SYBU	4
BP	GO:1902571	regulation of serine-type peptidase activity	4/852	10/18723	0.000717364	0.0386834	0.0370504	ANXA8/SPINK5/ANXA8L1/SPINK1	4
BP	GO:0034724	DNA replication-independent nucleosome organization	7/852	34/18723	0.000721737	0.0386834	0.0370504	H4C3/H4C4/H4C1/H4C5/H4C2/H4C15/H4C11	7
BP	GO:0098742	cell-cell adhesion via plasma-membrane adhesion molecules	25/852	273/18723	0.000736815	0.0390157	0.0373687	CDH18/DSG3/CDHR2/CDHR5/CLDN20/CLDN18/CDH22/CDH7/MYOT/CDH16/PCDHA9/CDH17/IL1RAPL1/NLGN1/PCDHGC4/CNTN2/DCHS2/PCDH9/PCDHGA8/MYPN/PCDHB1/CD177/IGFN1/KLF4/PCDH8	25
BP	GO:0006720	isoprenoid metabolic process	14/852	116/18723	0.00079764	0.0412427	0.0395017	HMGCS2/AKR1B10/TTR/CYP2C18/AKR1B15/RLBP1/CRABP1/DHRS9/ADH7/AKR1C1/CYP1A1/CYP2W1/CYP3A5/CYP3A7	14
BP	GO:0033559	unsaturated fatty acid metabolic process	14/852	116/18723	0.00079764	0.0412427	0.0395017	AWAT1/CYP4A22/CYP4A11/PLA2G10/CYP4F3/CYP2C18/CYP4F11/CYP4Z1/CBR1/PTGR2/AKR1C1/CYP1A1/HPGD/AKR1C2	14
BP	GO:0048469	cell maturation	18/852	171/18723	0.000814143	0.0416065	0.0398502	SLFN14/SLC26A3/GHRHR/ACTL6B/FGG/DEFB1/IHH/CATSPER4/SPINK1/ADGRB3/CNTN2/EPO/WEE2/RND1/IL21/SLC26A8/ASCL1/NR4A2	18
BP	GO:0045745	positive regulation of G protein-coupled receptor signaling pathway	6/852	26/18723	0.000917903	0.0463699	0.0444125	KLK6/CHGA/KLK5/CNTN2/MRAP2/MRAP	6
CC	GO:0000786	nucleosome	35/923	109/19550	3.10863e-20	1.47971e-17	1.35471e-17	H3C7/H4C3/H4C4/H2AC12/H3C11/H4C1/H2AC21/H4C5/H3C2/H2BC14/H2AC4/H4C2/H3C3/H3C1/H2AC16/H3C12/H2BC7/H2BC17/H2BC9/H2BC13/H2BC8/H3C13/H2BC18/H2AC8/H3C8/H2AC20/H2AC13/H2BC11/H2AC11/H2AC18/H4C15/H2BC6/H4C11/H3C14/H2BU1	35
CC	GO:0044815	DNA packaging complex	35/923	117/19550	4.14015e-19	9.85356e-17	9.02117e-17	H3C7/H4C3/H4C4/H2AC12/H3C11/H4C1/H2AC21/H4C5/H3C2/H2BC14/H2AC4/H4C2/H3C3/H3C1/H2AC16/H3C12/H2BC7/H2BC17/H2BC9/H2BC13/H2BC8/H3C13/H2BC18/H2AC8/H3C8/H2AC20/H2AC13/H2BC11/H2AC11/H2AC18/H4C15/H2BC6/H4C11/H3C14/H2BU1	35
CC	GO:0032993	protein-DNA complex	39/923	199/19550	2.63029e-14	4.1734e-12	3.82085e-12	H3C7/H4C3/H4C4/H2AC12/H3C11/H4C1/H2AC21/H4C5/H3C2/H2BC14/H2AC4/H4C2/H3C3/H3C1/H2AC16/H3C12/H2BC7/H2BC17/H2BC9/H2BC13/H2BC8/H3C13/ST18/TERT/H2BC18/H2AC8/H3C8/H2AC20/H2AC13/H2BC11/H2AC11/H2AC18/RPA4/H4C15/H2BC6/TEN1/H4C11/H3C14/H2BU1	39
CC	GO:0034703	cation channel complex	24/923	210/19550	5.80236e-05	0.00574425	0.005259	KCNC1/VWC2L/GRIN2B/KCNIP4/KCNQ2/GRIA2/HCN4/SHISA9/GRIA4/KCNV2/KCNB2/UNC80/CATSPER4/GRIN2C/KCNF1/HCN1/CACNA1E/SCN2A/KCNK2/SCN3A/CACNA1B/CACNG5/KCNG3/PKD1L3	24
CC	GO:0062023	collagen-containing extracellular matrix	39/923	425/19550	6.03387e-05	0.00574425	0.005259	COL2A1/LGALS4/S100A7/MUC2/ANGPTL3/PRSS1/FGA/GPC2/ANXA8/COL20A1/TMEFF2/FBN3/ANGPTL7/FGB/INHBE/ADAM11/IMPG1/COL17A1/FGG/SLPI/NCAM1/USH2A/ITGB4/HRNR/KNG1/COL4A6/COL11A2/ATRNL1/TINAG/SFRP1/PF4/ADAMTS20/SMOC1/NPPA/PZP/EMILIN3/NTN5/PRTN3/THBS4	39
CC	GO:0000228	nuclear chromosome	25/923	227/19550	7.54855e-05	0.00598852	0.00548263	H3C7/H4C3/H4C4/H3C11/H4C1/H4C5/H3C2/H4C2/H3C3/H3C1/H3C12/TTN/MSH4/H3C8/SHOC1/SYCP2/TEX12/RPA4/H4C15/RNF212B/SMC1B/MEI4/SYCP3/H4C11/MSH5	25
CC	GO:0034702	ion channel complex	28/923	282/19550	0.000175816	0.0119555	0.0109455	KCNC1/VWC2L/GRIN2B/KCNIP4/CHRND/GABRP/KCNQ2/GRIA2/HCN4/SHISA9/GRIA4/KCNV2/KCNB2/UNC80/CATSPER4/GRIN2C/KCNF1/HCN1/CACNA1E/SCN2A/KCNK2/SCN3A/CACNA1B/GABRE/CACNG5/KCNG3/PKD1L3/CHRNB2	28
CC	GO:0001533	cornified envelope	9/923	45/19550	0.000214102	0.012739	0.0116629	DSG3/SPRR3/PI3/SPRR1B/SPRR1A/SPRR2D/SPRR2A/HRNR/IVL	9
CC	GO:0044306	neuron projection terminus	17/923	141/19550	0.000357824	0.0189249	0.0173262	CALB1/KCNC1/NTSR1/CCK/SYT4/NTS/SCRG1/CPLX2/USH2A/KCNK2/UCN3/ADCYAP1/CALB2/BSN/HTR1B/OPRD1/GNRH1	17
MF	GO:0046982	protein heterodimerization activity	48/881	328/18368	4.74912e-12	3.65682e-09	3.26939e-09	H3C7/H4C3/H4C4/H2AC12/H3C11/H4C1/H2AC21/H4C5/H3C2/H2BC14/H2AC4/H4C2/H3C3/H3C1/H2AC16/H3C12/H2BC7/SYT4/MAPK4/H2BC17/H2BC9/H2BC13/SDCBP2/H2BC8/H3C13/H2BC18/H2AC8/H3C8/H2AC20/H2AC13/H2BC11/H2AC11/SLC3A1/PGLYRP3/KCNB2/H2AC18/GPHA2/H4C15/SOHLH2/H2BC6/APOA2/ADD2/H4C11/H3C14/H2BU1/NPAS3/NR4A2/NR4A1	48
MF	GO:0033038	bitter taste receptor activity	10/881	20/18368	7.3005e-09	2.81069e-06	2.51291e-06	TAS2R30/TAS2R50/TAS2R13/TAS2R3/TAS2R43/TAS2R31/TAS2R4/TAS2R10/TAS2R20/TAS2R14	10
MF	GO:0008527	taste receptor activity	11/881	26/18368	1.15698e-08	2.96959e-06	2.65497e-06	TAS2R30/TAS2R50/TAS2R13/TAS2R3/TAS2R43/TAS2R31/TAS2R4/TAS2R10/TAS2R20/TAS2R14/PKD1L3	11
MF	GO:0004867	serine-type endopeptidase inhibitor activity	20/881	98/18368	3.29551e-08	6.34385e-06	5.67174e-06	WFDC5/SPINK4/SERPINA4/PI3/A2ML1/SERPINB5/SERPINB7/WFDC13/SERPINB3/SPINK5/SPINK9/SERPINB2/SLPI/SERPINB4/SPINK1/WFDC12/SERPINI2/FURIN/SERPINE3/PZP	20
MF	GO:0015267	channel activity	51/881	480/18368	8.83886e-08	1.14768e-05	1.02609e-05	KCNJ13/KCNC1/GJB4/GRIN2B/PEX5L/GJB5/KCNH5/CHRNG/PKD2L2/KCNIP4/GJB3/CHRND/ZACN/CALHM3/FXYD4/GABRP/KCNQ2/TRPM3/ASIC5/GRIA2/GRIK1/HCN4/GRIA4/KCNJ9/SLC9C1/KCNV2/KCNB2/UNC80/KCNH7/TRPA1/CATSPER4/GRIN2C/TRPM5/KCNF1/HCN1/CACNA1E/SCN2A/KCNK2/SCN3A/CACNA1B/GABRE/KCNJ10/TMC3/SLC26A8/CACNG5/HTR1B/KCNG3/PKD1L3/GJA9/CHRNB2/GJC3	51
MF	GO:0022803	passive transmembrane transporter activity	51/881	481/18368	9.4429e-08	1.14768e-05	1.02609e-05	KCNJ13/KCNC1/GJB4/GRIN2B/PEX5L/GJB5/KCNH5/CHRNG/PKD2L2/KCNIP4/GJB3/CHRND/ZACN/CALHM3/FXYD4/GABRP/KCNQ2/TRPM3/ASIC5/GRIA2/GRIK1/HCN4/GRIA4/KCNJ9/SLC9C1/KCNV2/KCNB2/UNC80/KCNH7/TRPA1/CATSPER4/GRIN2C/TRPM5/KCNF1/HCN1/CACNA1E/SCN2A/KCNK2/SCN3A/CACNA1B/GABRE/KCNJ10/TMC3/SLC26A8/CACNG5/HTR1B/KCNG3/PKD1L3/GJA9/CHRNB2/GJC3	51
MF	GO:0005261	cation channel activity	40/881	335/18368	1.04335e-07	1.14768e-05	1.02609e-05	KCNJ13/KCNC1/GRIN2B/PEX5L/KCNH5/CHRNG/PKD2L2/KCNIP4/CHRND/CALHM3/FXYD4/KCNQ2/TRPM3/ASIC5/GRIA2/GRIK1/HCN4/GRIA4/KCNJ9/KCNV2/KCNB2/UNC80/KCNH7/TRPA1/CATSPER4/GRIN2C/TRPM5/KCNF1/HCN1/CACNA1E/SCN2A/KCNK2/SCN3A/CACNA1B/KCNJ10/CACNG5/HTR1B/KCNG3/PKD1L3/CHRNB2	40
MF	GO:0022836	gated channel activity	40/881	340/18368	1.55645e-07	1.49808e-05	1.33936e-05	KCNJ13/KCNC1/GRIN2B/PEX5L/KCNH5/CHRNG/KCNIP4/CHRND/ZACN/CALHM3/GABRP/KCNQ2/TRPM3/ASIC5/GRIA2/GRIK1/HCN4/GRIA4/KCNJ9/KCNV2/KCNB2/KCNH7/TRPA1/CATSPER4/GRIN2C/TRPM5/KCNF1/HCN1/CACNA1E/SCN2A/KCNK2/SCN3A/CACNA1B/GABRE/KCNJ10/TMC3/CACNG5/HTR1B/KCNG3/CHRNB2	40
MF	GO:0005216	ion channel activity	46/881	432/18368	3.5752e-07	3.05878e-05	2.73472e-05	KCNJ13/KCNC1/GRIN2B/PEX5L/KCNH5/CHRNG/PKD2L2/KCNIP4/CHRND/ZACN/CALHM3/FXYD4/GABRP/KCNQ2/TRPM3/ASIC5/GRIA2/GRIK1/HCN4/GRIA4/KCNJ9/SLC9C1/KCNV2/KCNB2/UNC80/KCNH7/TRPA1/CATSPER4/GRIN2C/TRPM5/KCNF1/HCN1/CACNA1E/SCN2A/KCNK2/SCN3A/CACNA1B/GABRE/KCNJ10/TMC3/SLC26A8/CACNG5/HTR1B/KCNG3/PKD1L3/CHRNB2	46
MF	GO:0004866	endopeptidase inhibitor activity	26/881	180/18368	4.91525e-07	3.78474e-05	3.38376e-05	WFDC5/SPINK4/SERPINA4/PI3/A2ML1/SERPINB5/SERPINB7/WFDC13/SERPINB3/SPINK5/SPINK9/SERPINB2/SLPI/SERPINB4/SPINK1/WFDC12/LTF/CST4/KNG1/SERPINI2/FURIN/SERPINE3/FETUB/PZP/MT3/SPOCK3	26
MF	GO:0030414	peptidase inhibitor activity	26/881	187/18368	1.03723e-06	7.26063e-05	6.49139e-05	WFDC5/SPINK4/SERPINA4/PI3/A2ML1/SERPINB5/SERPINB7/WFDC13/SERPINB3/SPINK5/SPINK9/SERPINB2/SLPI/SERPINB4/SPINK1/WFDC12/LTF/CST4/KNG1/SERPINI2/FURIN/SERPINE3/FETUB/PZP/MT3/SPOCK3	26
MF	GO:0070330	aromatase activity	9/881	25/18368	1.31502e-06	8.16688e-05	7.30162e-05	CYP4A11/CYP4F3/CYP2C18/CYP4F11/CYP4Z1/CYP3A43/CYP1A1/CYP3A5/CYP3A7	9
MF	GO:0015079	potassium ion transmembrane transporter activity	23/881	155/18368	1.37882e-06	8.16688e-05	7.30162e-05	SLC9A4/KCNJ13/KCNC1/SLC12A1/ATP4A/KCNH5/KCNIP4/FXYD4/KCNQ2/GRIK1/HCN4/KCNJ9/SLC9C1/KCNV2/KCNB2/KCNH7/TRPM5/SLC9A2/KCNF1/HCN1/KCNK2/KCNJ10/KCNG3	23
MF	GO:0004497	monooxygenase activity	18/881	102/18368	1.52894e-06	8.40916e-05	7.51824e-05	CYP4A22/CYP24A1/CYP4A11/CYP4F3/CYP2C18/NOS1/DBH/CYP4F11/CYP4Z1/TPH1/CYP3A43/AKR1C1/CYP1A1/CYP2W1/JMJD7/CYP3A5/CYP3A7/AKR1C2	18
MF	GO:0046873	metal ion transmembrane transporter activity	44/881	430/18368	1.88318e-06	9.667e-05	8.64282e-05	SLC9A4/KCNJ13/KCNC1/SLC13A5/GRIN2B/SLC12A1/ATP4A/KCNH5/SLC10A1/PKD2L2/KCNIP4/FXYD4/KCNQ2/SLC6A15/SLC4A9/TRPM3/ASIC5/GRIK1/HCN4/KCNJ9/SLC9C1/KCNV2/KCNB2/KCNH7/TRPA1/CATSPER4/SLC30A8/GRIN2C/TRPM5/SLC9A2/KCNF1/SLC30A10/HCN1/CACNA1E/SCN2A/KCNK2/SCN3A/CACNA1B/KCNJ10/CACNG5/HTR1B/KCNG3/PKD1L3/SLC30A3	44
MF	GO:0061135	endopeptidase regulator activity	26/881	194/18368	2.09886e-06	0.000101008	9.03064e-05	WFDC5/SPINK4/SERPINA4/PI3/A2ML1/SERPINB5/SERPINB7/WFDC13/SERPINB3/SPINK5/SPINK9/SERPINB2/SLPI/SERPINB4/SPINK1/WFDC12/LTF/CST4/KNG1/SERPINI2/FURIN/SERPINE3/FETUB/PZP/MT3/SPOCK3	26
MF	GO:0005244	voltage-gated ion channel activity	26/881	201/18368	4.08568e-06	0.000174776	0.000156259	KCNJ13/KCNC1/GRIN2B/KCNH5/KCNIP4/CALHM3/KCNQ2/HCN4/KCNJ9/KCNV2/KCNB2/KCNH7/CATSPER4/GRIN2C/TRPM5/KCNF1/HCN1/CACNA1E/SCN2A/KCNK2/SCN3A/CACNA1B/KCNJ10/CACNG5/HTR1B/KCNG3	26
MF	GO:0022832	voltage-gated channel activity	26/881	201/18368	4.08568e-06	0.000174776	0.000156259	KCNJ13/KCNC1/GRIN2B/KCNH5/KCNIP4/CALHM3/KCNQ2/HCN4/KCNJ9/KCNV2/KCNB2/KCNH7/CATSPER4/GRIN2C/TRPM5/KCNF1/HCN1/CACNA1E/SCN2A/KCNK2/SCN3A/CACNA1B/KCNJ10/CACNG5/HTR1B/KCNG3	26
MF	GO:0022843	voltage-gated cation channel activity	21/881	143/18368	4.64535e-06	0.000188259	0.000168314	KCNJ13/KCNC1/GRIN2B/KCNH5/KCNQ2/HCN4/KCNJ9/KCNV2/KCNB2/KCNH7/CATSPER4/GRIN2C/KCNF1/HCN1/CACNA1E/KCNK2/CACNA1B/KCNJ10/CACNG5/HTR1B/KCNG3	21
MF	GO:0004252	serine-type endopeptidase activity	23/881	174/18368	1.01045e-05	0.000389025	0.000347809	PRSS48/PRSS2/PRSS1/KLK7/KLK8/PRSS33/PRSS37/KLK6/PCSK2/PRSS3/HP/PRSS53/TMPRSS11A/KLK10/KLK5/TMPRSS11D/TMPRSS6/LTF/MASP2/TMPRSS9/PCSK9/FURIN/PRTN3	23
MF	GO:0016712	oxidoreductase activity, acting on paired donors, with incorporation or reduction of molecular oxygen, reduced flavin or flavoprotein as one donor, and incorporation of one atom of oxygen	10/881	40/18368	1.39541e-05	0.000511651	0.000457443	CYP4A11/CYP4F3/CYP2C18/CYP4F11/CYP4Z1/CYP3A43/CYP1A1/CYP2W1/CYP3A5/CYP3A7	10
MF	GO:0015276	ligand-gated ion channel activity	20/881	143/18368	1.63291e-05	0.000530196	0.000474023	KCNJ13/GRIN2B/PEX5L/CHRNG/CHRND/ZACN/GABRP/ASIC5/GRIA2/GRIK1/HCN4/GRIA4/KCNJ9/TRPA1/GRIN2C/TRPM5/HCN1/GABRE/KCNJ10/CHRNB2	20
MF	GO:0022834	ligand-gated channel activity	20/881	143/18368	1.63291e-05	0.000530196	0.000474023	KCNJ13/GRIN2B/PEX5L/CHRNG/CHRND/ZACN/GABRP/ASIC5/GRIA2/GRIK1/HCN4/GRIA4/KCNJ9/TRPA1/GRIN2C/TRPM5/HCN1/GABRE/KCNJ10/CHRNB2	20
MF	GO:0061134	peptidase regulator activity	27/881	230/18368	1.65256e-05	0.000530196	0.000474023	WFDC5/SPINK4/SERPINA4/PI3/A2ML1/SERPINB5/SERPINB7/WFDC13/SERPINB3/SPINK5/SPINK9/SERPINB2/SLPI/SERPINB4/SPINK1/WFDC12/LTF/CST4/KNG1/SERPINI2/FURIN/SERPINE3/FETUB/ST20/PZP/MT3/SPOCK3	27
MF	GO:0005267	potassium channel activity	18/881	121/18368	1.82857e-05	0.0005632	0.000503531	KCNJ13/KCNC1/KCNH5/KCNIP4/FXYD4/KCNQ2/GRIK1/HCN4/KCNJ9/KCNV2/KCNB2/KCNH7/TRPM5/KCNF1/HCN1/KCNK2/KCNJ10/KCNG3	18
MF	GO:0005179	hormone activity	18/881	122/18368	2.05061e-05	0.000607295	0.000542954	INSL4/INSL6/CCK/NTS/CGA/INHBE/INHA/TTR/CALCB/GPHA2/VGF/EPO/SPX/UCN3/CCL25/ADCYAP1/NPPA/GNRH1	18
MF	GO:0017171	serine hydrolase activity	24/881	195/18368	2.2029e-05	0.000628233	0.000561674	PRSS48/PRSS2/PRSS1/KLK7/KLK8/PRSS33/PRSS37/KLK6/PCSK2/PRSS3/HP/PRSS53/TMPRSS11A/KLK10/KLK5/TMPRSS11D/TMPRSS6/LTF/MASP2/TMPRSS9/PCSK9/FURIN/AADAC/PRTN3	24
MF	GO:0008066	glutamate receptor activity	8/881	27/18368	2.66612e-05	0.000709358	0.000634204	GRIN2B/GRIA2/GRIK1/GRIA4/GRM6/GRM4/GRIN2C/GRM3	8
MF	GO:0099094	ligand-gated cation channel activity	17/881	113/18368	2.67161e-05	0.000709358	0.000634204	KCNJ13/GRIN2B/PEX5L/CHRNG/CHRND/ASIC5/GRIA2/GRIK1/HCN4/GRIA4/KCNJ9/TRPA1/GRIN2C/TRPM5/HCN1/KCNJ10/CHRNB2	17
MF	GO:0008391	arachidonic acid monooxygenase activity	7/881	21/18368	3.66855e-05	0.000941595	0.000841836	CYP4A22/CYP4A11/CYP4F3/CYP2C18/CYP4F11/CYP4Z1/CYP1A1	7
MF	GO:0008236	serine-type peptidase activity	23/881	191/18368	4.58954e-05	0.00113998	0.00101921	PRSS48/PRSS2/PRSS1/KLK7/KLK8/PRSS33/PRSS37/KLK6/PCSK2/PRSS3/HP/PRSS53/TMPRSS11A/KLK10/KLK5/TMPRSS11D/TMPRSS6/LTF/MASP2/TMPRSS9/PCSK9/FURIN/PRTN3	23
MF	GO:0005249	voltage-gated potassium channel activity	14/881	90/18368	9.29593e-05	0.00223683	0.00199985	KCNJ13/KCNC1/KCNH5/KCNQ2/HCN4/KCNJ9/KCNV2/KCNB2/KCNH7/KCNF1/HCN1/KCNK2/KCNJ10/KCNG3	14
MF	GO:0030594	neurotransmitter receptor activity	15/881	111/18368	0.0002668	0.00622534	0.00556579	GRIN2B/CHRNG/CHRND/ZACN/GABRP/GRIA2/GRIK1/GRIA4/OR10H5/CHRM5/GRIN2C/HTR2B/GABRE/HTR1B/CHRNB2	15
MF	GO:0005184	neuropeptide hormone activity	7/881	30/18368	0.000440096	0.00977643	0.00874065	CCK/NTS/CALCB/VGF/SPX/ADCYAP1/NPPA	7
MF	GO:0004175	endopeptidase activity	37/881	430/18368	0.000444383	0.00977643	0.00874065	PRSS48/PRSS2/ADAM20/PRSS1/KLK7/MEP1B/KLK8/ADAMTS19/PRSS33/PRSS37/KLK6/PCSK2/PRSS3/HP/CTSE/ADAM11/CAPN9/MMP21/CAPN5/PRSS53/TMPRSS11A/KLK10/KLK5/TMPRSS11D/TMPRSS6/LTF/CAPNS2/MASP2/TMPRSS9/PCSK9/USP6/TINAG/SFRP1/FURIN/ADAMTS20/JMJD7/PRTN3	37
MF	GO:0005230	extracellular ligand-gated ion channel activity	11/881	73/18368	0.00067772	0.0144957	0.0129599	GRIN2B/CHRNG/CHRND/ZACN/GABRP/GRIA2/GRIK1/GRIA4/GRIN2C/GABRE/CHRNB2	11
MF	GO:0046906	tetrapyrrole binding	17/881	149/18368	0.000807916	0.0168134	0.0150321	TCN1/DUOX2/CYP4A22/CYP24A1/CYP4A11/CYP4F3/FA2H/CYP2C18/IDO2/NOS1/CYP4F11/CYP4Z1/CYP3A43/CYP1A1/CYP2W1/CYP3A5/CYP3A7	17
MF	GO:0008401	retinoic acid 4-hydroxylase activity	4/881	10/18368	0.000874927	0.0177288	0.0158505	CYP2C18/CYP2W1/CYP3A5/CYP3A7	4
MF	GO:0005506	iron ion binding	17/881	151/18368	0.000939244	0.018544	0.0165794	CYP4A22/CYP24A1/TF/CYP4A11/CYP4F3/FA2H/CYP2C18/PPEF2/LTF/CYP4F11/CYP4Z1/TPH1/CYP3A43/CYP1A1/CYP2W1/CYP3A5/CYP3A7	17
MF	GO:0020037	heme binding	16/881	139/18368	0.00103378	0.0199003	0.0177919	DUOX2/CYP4A22/CYP24A1/CYP4A11/CYP4F3/FA2H/CYP2C18/IDO2/NOS1/CYP4F11/CYP4Z1/CYP3A43/CYP1A1/CYP2W1/CYP3A5/CYP3A7	16
MF	GO:0048018	receptor ligand activity	39/881	487/18368	0.00124848	0.0233673	0.0208916	TFF1/INSL4/INSL6/ANGPTL3/CCK/CKLF/FAM3D/NTS/DKK1/IL5/WNT7A/REG1A/CGA/INHBE/EPHA7/INHA/TTR/CXCL14/CALCB/GPHA2/FGF12/IL37/IL26/VGF/EPO/TAFA4/SPX/UCN3/CCL25/FGF17/ADCYAP1/CCL15/IFNG/PF4/IL21/NRG3/NPPA/THBS4/GNRH1	39
MF	GO:0008569	minus-end-directed microtubule motor activity	5/881	18/18368	0.00127458	0.0233673	0.0208916	DNAH8/DNAH11/DNAH14/DNHD1/DNAH17	5
MF	GO:0016705	oxidoreductase activity, acting on paired donors, with incorporation or reduction of molecular oxygen	18/881	170/18368	0.00137637	0.0246466	0.0220354	CYP4A22/CYP24A1/CYP4A11/CYP4F3/CYP2C18/NOS1/DBH/CYP4F11/CYP4Z1/TPH1/CYP3A43/AKR1C1/CYP1A1/CYP2W1/JMJD7/CYP3A5/CYP3A7/AKR1C2	18
MF	GO:0071855	neuropeptide receptor binding	7/881	37/18368	0.00166177	0.0280918	0.0251156	NTS/MRAP2/MRAP/UCN3/ADCYAP1/TAC4/NPPA	7
MF	GO:0004970	ionotropic glutamate receptor activity	5/881	19/18368	0.00166209	0.0280918	0.0251156	GRIN2B/GRIA2/GRIK1/GRIA4/GRIN2C	5
MF	GO:0030546	signaling receptor activator activity	39/881	495/18368	0.00167821	0.0280918	0.0251156	TFF1/INSL4/INSL6/ANGPTL3/CCK/CKLF/FAM3D/NTS/DKK1/IL5/WNT7A/REG1A/CGA/INHBE/EPHA7/INHA/TTR/CXCL14/CALCB/GPHA2/FGF12/IL37/IL26/VGF/EPO/TAFA4/SPX/UCN3/CCL25/FGF17/ADCYAP1/CCL15/IFNG/PF4/IL21/NRG3/NPPA/THBS4/GNRH1	39
MF	GO:0004032	alditol:NADP+ 1-oxidoreductase activity	4/881	12/18368	0.00190938	0.0312813	0.0279672	AKR1B10/AKR1B15/AKR1C1/AKR1C2	4
MF	GO:0022824	transmitter-gated ion channel activity	9/881	60/18368	0.00211202	0.0331888	0.0296726	GRIN2B/CHRNG/CHRND/GRIA2/GRIK1/GRIA4/GRIN2C/GABRE/CHRNB2	9
MF	GO:0022835	transmitter-gated channel activity	9/881	60/18368	0.00211202	0.0331888	0.0296726	GRIN2B/CHRNG/CHRND/GRIA2/GRIK1/GRIA4/GRIN2C/GABRE/CHRNB2	9
MF	GO:0016614	oxidoreductase activity, acting on CH-OH group of donors	15/881	136/18368	0.00224263	0.0345365	0.0308775	ALDH3A1/HSD17B2/AKR1B10/CYP4A22/CYP4F3/AKR1B15/LDHAL6A/DHRS2/DHRS9/CBR1/ADH7/PTGR2/AKR1C1/HPGD/AKR1C2	15
MF	GO:0016616	oxidoreductase activity, acting on the CH-OH group of donors, NAD or NADP as acceptor	14/881	124/18368	0.00249253	0.0376024	0.0336185	ALDH3A1/HSD17B2/AKR1B10/CYP4A22/AKR1B15/LDHAL6A/DHRS2/DHRS9/CBR1/ADH7/PTGR2/AKR1C1/HPGD/AKR1C2	14
MF	GO:0015081	sodium ion transmembrane transporter activity	16/881	152/18368	0.00263037	0.0376024	0.0336185	SLC9A4/SLC13A5/SLC12A1/ATP4A/SLC10A1/SLC6A15/SLC4A9/ASIC5/GRIK1/HCN4/SLC9C1/TRPM5/SLC9A2/HCN1/SCN2A/SCN3A	16
MF	GO:0072582	17-beta-hydroxysteroid dehydrogenase (NADP+) activity	4/881	13/18368	0.00265402	0.0376024	0.0336185	HSD17B2/AKR1B15/AKR1C1/AKR1C2	4
MF	GO:0005243	gap junction channel activity	5/881	21/18368	0.00268588	0.0376024	0.0336185	GJB4/GJB5/GJB3/GJA9/GJC3	5
MF	GO:0051428	peptide hormone receptor binding	5/881	21/18368	0.00268588	0.0376024	0.0336185	CCK/GPHA2/UCN3/ADCYAP1/GNRH1	5
MF	GO:0003774	cytoskeletal motor activity	13/881	114/18368	0.00320652	0.0440896	0.0394184	MYH4/MYO1A/KIF1A/MYH8/KIF5C/DNAH8/KIF5A/MYH7/MYH7B/DNAH11/DNAH14/DNHD1/DNAH17	13
MF	GO:0008106	alcohol dehydrogenase (NADP+) activity	5/881	22/18368	0.00334035	0.0451241	0.0403433	ALDH3A1/AKR1B10/AKR1B15/AKR1C1/AKR1C2	5
MF	GO:0008194	UDP-glycosyltransferase activity	15/881	143/18368	0.00364247	0.0483569	0.0432336	B4GALNT2/GCNT7/UGT2B15/MGAT4C/B3GNT6/B3GALT5/UGT2B4/GCNT3/B3GNT3/GALNT9/A3GALT2/HYAL1/UGT3A2/UGT1A6/B3GAT2	15
